# Supplementary material
Source: Springer Nature journal article supplement (https://www.springermedizin.de/resource/supplementary/13002_2014_405_MOESM1_ESM.pdf/9626838)

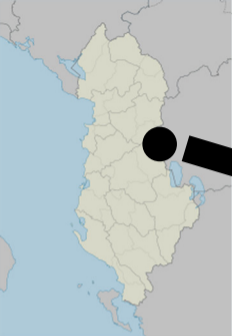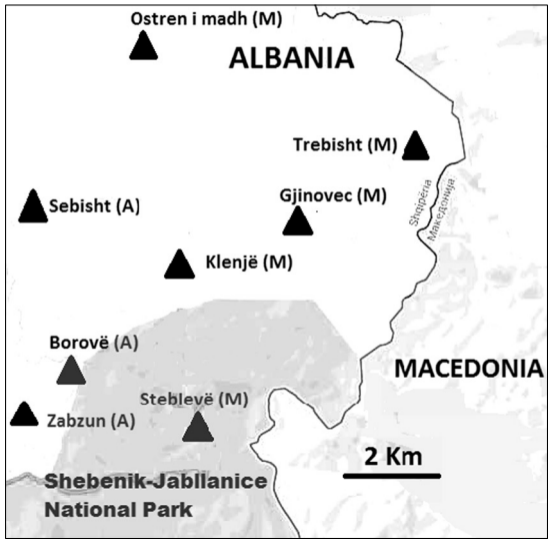

Supplement: MOESM1 [file 9626838]
